# Supplementary material for: Beyond good and evil
Source: Springer Nature journal article supplement (doi:10.1038/s44319-025-00465-x), 2025-05-01
Supplement: MOESM1 [file 44319_2025_465_MOESM1_ESM.pdf]

# Beyond Good and Evil

Gian Paolo Dotto

*Corresponding author(s): Gian Paolo Dotto (paolo.dotto@unil.ch)*

---

## Review Timeline:

Submission Date:

17th Apr 25

Accepted:

23rd Apr 25

---

*Editor: Holger Breithaupt*

**Transaction Report: This article was editorially reviewed.**
